# Supplementary material
Source: PubMed Central journal article supplement (PMC3658309)

Supplemental Figure 1

A. RayBiotech Cytokine Array III

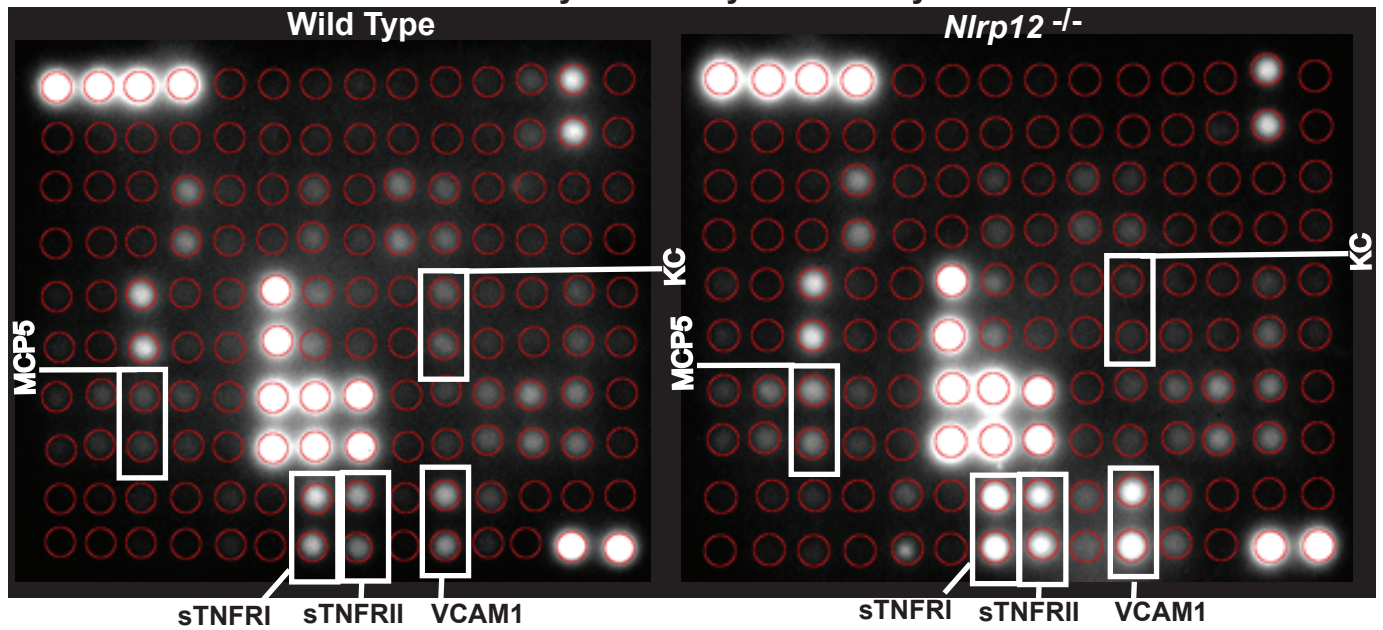

**B**

|              | Proteins     |             |
|--------------|--------------|-------------|
| Eotaxin-2    | IL5          | RANTES      |
| FAS ligand   | IL6          | SCF         |
| Fractalkine  | IL9          | SDF-1-alpha |
| G-CSF        | KC           | sTNF RI     |
| GM-CSF       | Leptin       | sTNF RII    |
| IFN-gamma    | Leptin R     | TARC        |
| IGF-BP-3     | LIX          | TCA-3       |
| IGF-BP-5     | L-Selectin   | TECK        |
| IGF-BP-6     | Lymphotactin | TIMP-1      |
| IL10         | MCP-1        | TNF-alpha   |
| IL12-p40/p70 | MCP-5        | TPO         |
| IL12-p70     | M-CSF        | VCAM-1      |
| IL13         | MIG          | VEGF        |
| IL17         | MIP-1-alpha  |             |
| IL1-alpha    | MIP-1-gamma  |             |
| IL1-beta     | MIP-2        |             |
| IL2          | MIP-3-alpha  |             |
| IL3          | MIP-3-beta   |             |
| IL3 Rb       | PF4          |             |
| IL4          | P-Selectin   |             |

**C**

| Protein  | Fold Change |
|----------|-------------|
| KC       | -2.97       |
| MCP5     | 3.46        |
| VCAM1    | 2.86        |
| sTNFR I  | 1.99        |
| sTNFR II | 2.68        |

Supplemental Figure 2

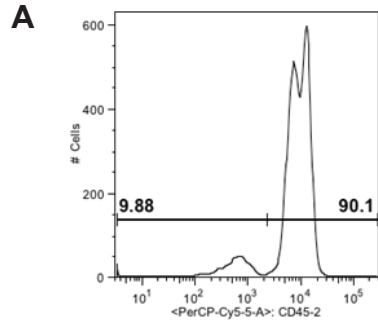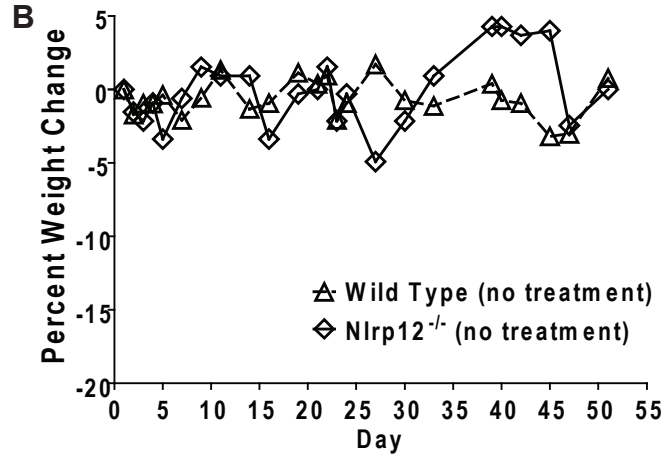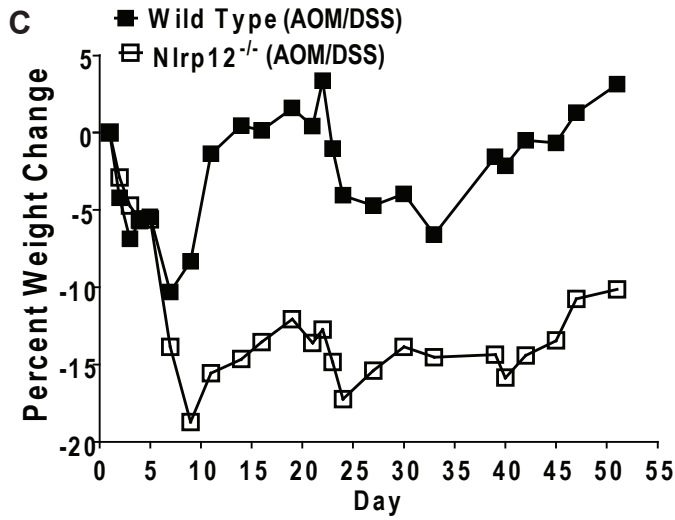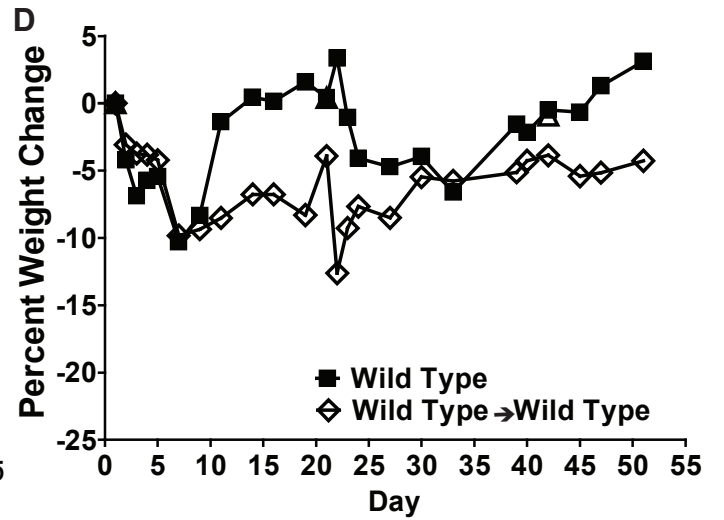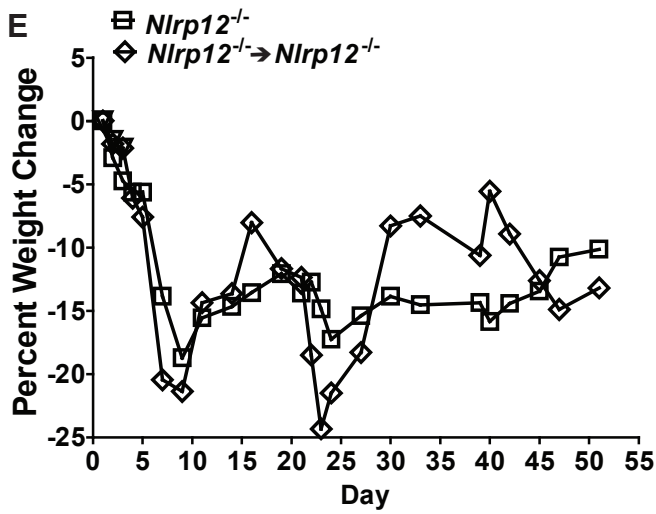

### Supplemental Figure 3

A.

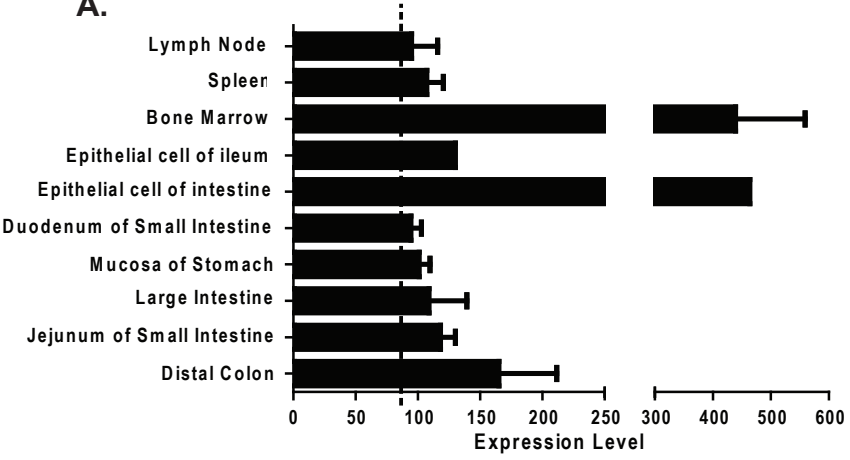

# Supplemental Figure 4

**A**

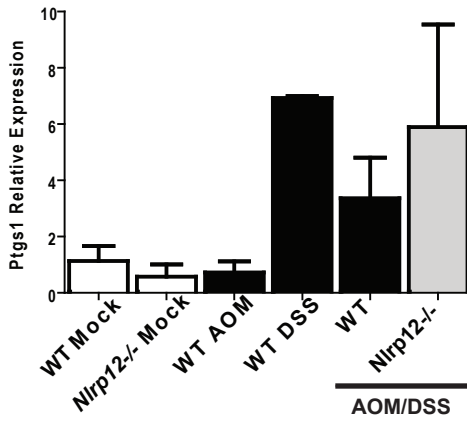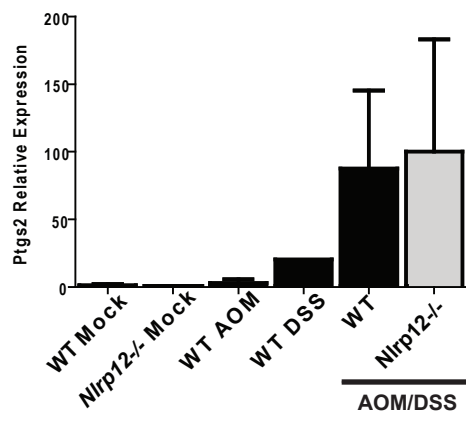

**B**

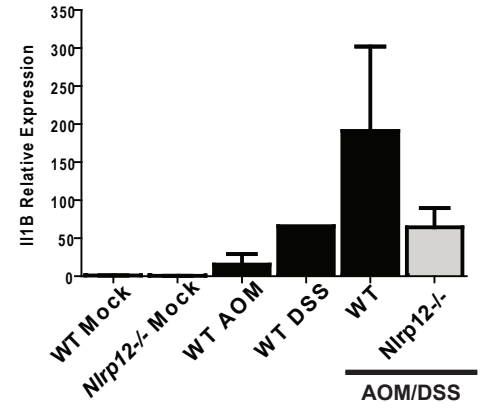

**C**

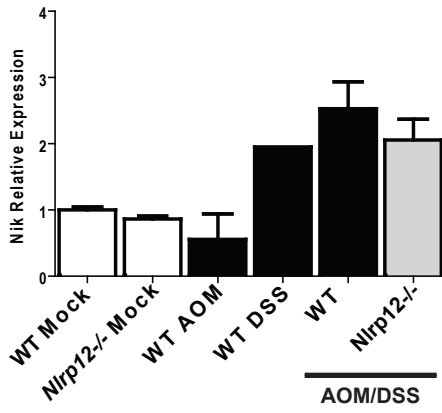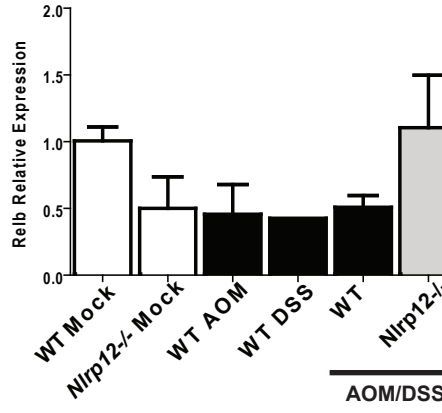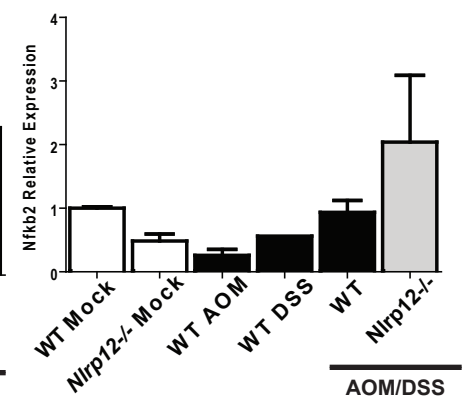

**D**

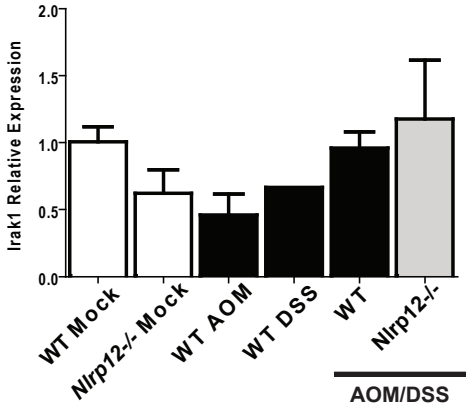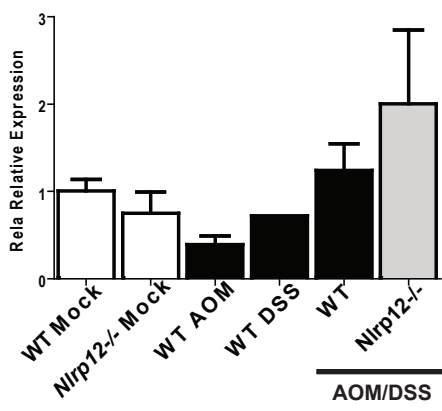

**E**

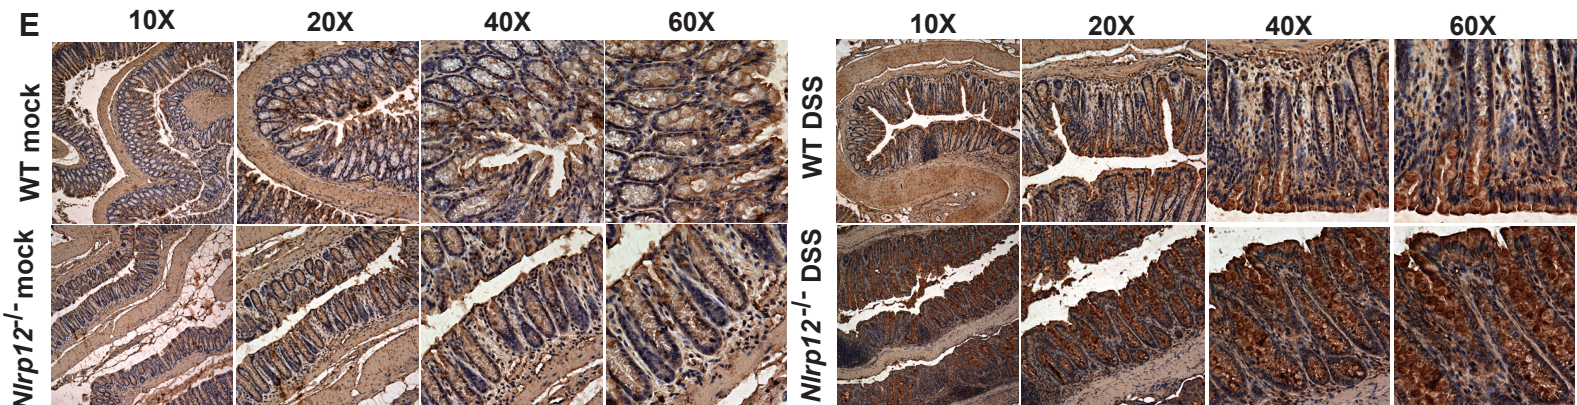

Supplement: NIHMS460347-supplement-01.pdf [file NIHMS460347-supplement-01.pdf]
